# Supplementary material for: Optical modulation of cell nucleus penetration and singlet oxygen release of a switchable platinum complex
Source: PubMed Central journal article supplement — iScience. 2023 Dec 9;27(1):108704. doi: 10.1016/j.isci.2023.108704 (PMC10829881; doi:10.1016/j.isci.2023.108704), 2023-12-09
Supplement: mmc1.pdf [file mmc1.pdf]

**iScience, Volume 27**

**Supplemental information**

**Optical modulation of cell nucleus penetration  
and singlet oxygen release  
of a switchable platinum complex**

**Zakaria Ziani, Saioa Cobo, Nathalie Berthet, and Guy Royal**

## List of Figures, Schemes and Tables

|                                                                                                                                                                                    |    |
|------------------------------------------------------------------------------------------------------------------------------------------------------------------------------------|----|
| <b>Scheme S1.</b> Preparation of <b>DHP-Pt<sub>2</sub></b> from <b>DHP-Py<sub>2</sub></b> .....                                                                                    | 2  |
| <b>Table S1.</b> Crystal Data and Structure Refinement for <b>DHP-Pt<sub>2</sub></b> .....                                                                                         | 2  |
| <b>Table S2.</b> IC50 values (μM) for <b>DHP-Pt<sub>2</sub></b> and <b>CPDO<sub>2</sub>-Pt<sub>2</sub></b> platinum complexes and cisplatin.....                                   | 4  |
| <b>Figure S1.</b> Emission spectrum of <b>DHP-Pt<sub>2</sub></b> in degassed CD <sub>2</sub> Cl <sub>2</sub> .....                                                                 | 3  |
| <b>Figure S2.</b> Phosphorescence band of singlet oxygen .....                                                                                                                     | 3  |
| <b>Figure S3.</b> Agarose gel electrophoresis images.....                                                                                                                          | 4  |
| <b>Figure S4.</b> Fluorescence intensity profiles .....                                                                                                                            | 5  |
| <b>Figure S5.</b> Thermal back isomerization of <b>CPDO<sub>2</sub>-Pt<sub>2</sub></b> to <b>DHP-Pt<sub>2</sub></b> and <sup>1</sup> O <sub>2</sub> release in tumorous cells..... | 6  |
| <b>Figure S6.</b> <sup>1</sup> H-NMR spectra of <b>DHP-Pt<sub>2</sub></b> in CD <sub>2</sub> Cl <sub>2</sub> .....                                                                 | 7  |
| <b>Figure S7.</b> <sup>13</sup> C-NMR spectra of <b>DHP-Pt<sub>2</sub></b> in CDCl <sub>3</sub> .....                                                                              | 7  |
| <b>Figure S8.</b> Evolution of the <sup>1</sup> H-NMR spectra of <b>DHP-Pt<sub>2</sub></b> during illumination .....                                                               | 8  |
| <b>Figure S9.</b> <sup>1</sup> H-NMR spectra of <b>CPDO<sub>2</sub>-Pt<sub>2</sub></b> .....                                                                                       | 9  |
| <b>Figure S10.</b> Mass spectra of <b>DHP-Pt<sub>2</sub></b> i .....                                                                                                               | 10 |
| <b>Figure S11.</b> Mass spectra of <b>CPDO<sub>2</sub>-Pt<sub>2</sub></b> .....                                                                                                    | 10 |

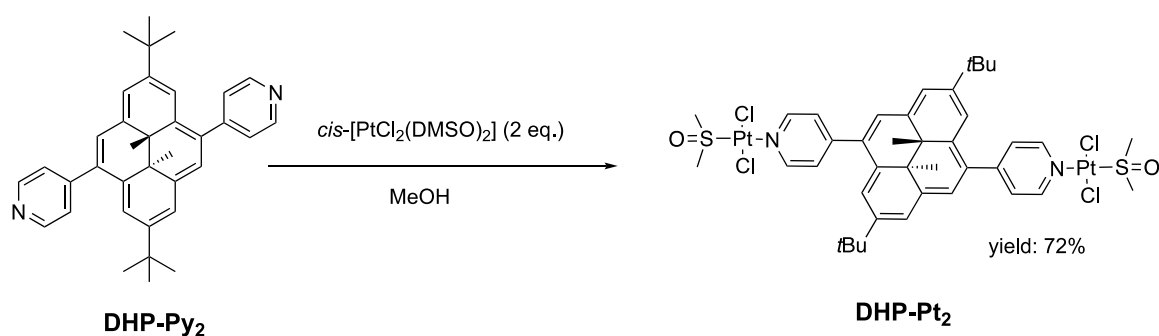

**Scheme S1.** Preparation of **DHP-Pt<sub>2</sub>** from **DHP-Py<sub>2</sub>** related to Figure 1.

**Table S1.** Crystal Data and Structure Refinement for **DHP-Pt<sub>2</sub>** related to Figure 1.

|                                                              |                                                                                                              |
|--------------------------------------------------------------|--------------------------------------------------------------------------------------------------------------|
| <b>Formula</b>                                               | C <sub>40</sub> H <sub>50</sub> Cl <sub>4</sub> N <sub>2</sub> O <sub>2</sub> Pt <sub>2</sub> S <sub>2</sub> |
| <b>Fw (g mol<sup>-1</sup>)</b>                               | 1186.92                                                                                                      |
| <b>Crystal system</b>                                        | Monoclinic                                                                                                   |
| <b>Space group</b>                                           | P2 <sub>1</sub> /c                                                                                           |
| <b>a (Å)</b>                                                 | 5.8439(12)                                                                                                   |
| <b>b (Å)</b>                                                 | 28.182(6)                                                                                                    |
| <b>c (Å)</b>                                                 | 13.367(3)                                                                                                    |
| <b>α (deg.)</b>                                              | 90                                                                                                           |
| <b>β (deg.)</b>                                              | 99.61(3)                                                                                                     |
| <b>γ (deg.)</b>                                              | 90                                                                                                           |
| <b>V (Å<sup>3</sup>) / Z</b>                                 | 2170.6(8)                                                                                                    |
| <b>D<sub>x</sub> (g cm<sup>-3</sup>)</b>                     | 1.816                                                                                                        |
| <b>μ (cm<sup>-1</sup>)</b>                                   | 6.816                                                                                                        |
| <b>Crystal dim. (mm)</b>                                     | 0.10 x 0.27 x 0.38                                                                                           |
| <b>T (K)</b>                                                 | 200                                                                                                          |
| <b>θ range for coll. (deg.)</b>                              | 3.091-27.000                                                                                                 |
| <b>nb. of rflns. coll.</b>                                   | 24281                                                                                                        |
| <b>Data/restraints/parameters</b>                            | 3802/0/241                                                                                                   |
| <b>R (I)<sup>a</sup> all/R[I &gt; 2σ(I)]</b>                 | 0.0585/0.0405                                                                                                |
| <b>Goodness of fit S</b>                                     | 1.122                                                                                                        |
| <b>Δρ<sub>min</sub>/ Δρ<sub>max</sub> (e Å<sup>-3</sup>)</b> | -1.047/2.380                                                                                                 |

$$^a R = \sum ||f_o| - |f_c|| / \sum |f_o|.$$

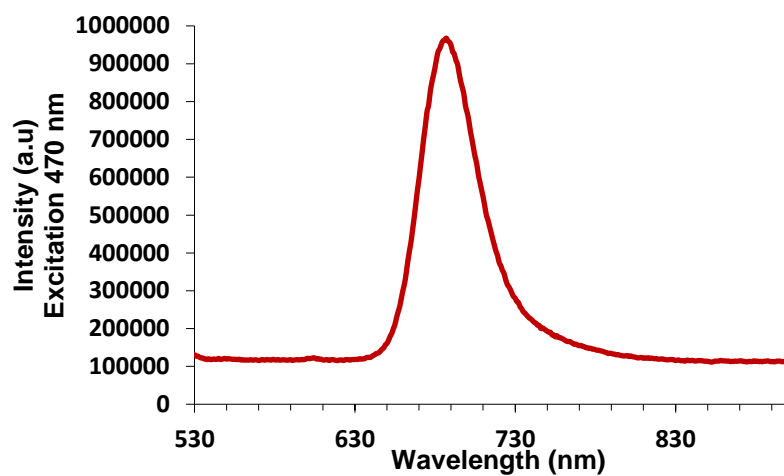

**Figure S1.** Emission spectrum of **DHP-Pt<sub>2</sub>** in degassed CD<sub>2</sub>Cl<sub>2</sub> related to Figure 5.

Excitation wavelength: 470 nm.

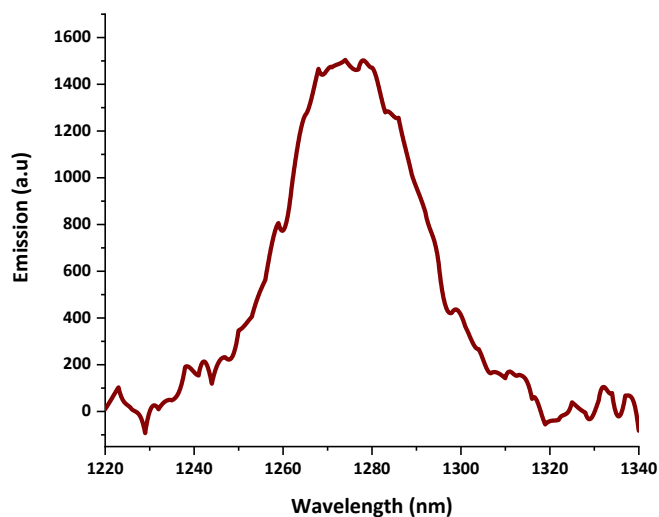

**Figure S2.** Phosphorescence band of singlet oxygen related to Figure 6.

Phosphorescence band of singlet oxygen characteristic of the deexcitation of the metastable singlet oxygen (<sup>1</sup>O<sub>2</sub>) to its triplet ground state (<sup>3</sup>O<sub>2</sub>) of a solution of **DHP-Pt<sub>2</sub>** in dichloromethane at 25°C. OD = 0.1.

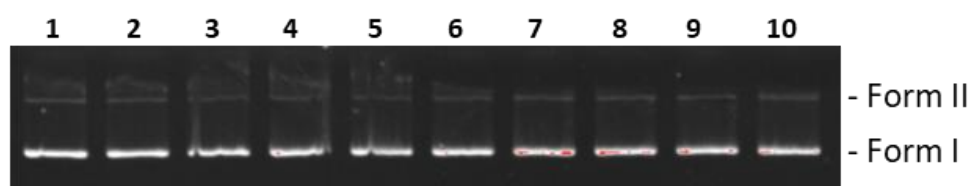

**Figure S3.** Agarose gel electrophoresis images

Agarose gel electrophoresis images of pBR322 DNA plasmid ( $13 \mu\text{g}\cdot\text{mL}^{-1}$ ) incubated for 16h at  $37^\circ\text{C}$  with increasing concentrations of *bis*-pyridine **DHP-Py<sub>2</sub>** ligand. Lane 1: pure plasmid DNA; Lanes 2-10: 0.09, 0.19, 0.39, 0.78, 1.56, 3.12, 6.25, 12.5, 25  $\mu\text{M}$  of compound related to Figure 3.

**Table S2.** IC<sub>50</sub> values ( $\mu\text{M}$ ) for **DHP-Pt<sub>2</sub>** and **CPDO<sub>2</sub>-Pt<sub>2</sub>** platinum complexes and cisplatin related to Figure 4.

IC<sub>50</sub> values ( $\mu\text{M}$ ) for **DHP-Pt<sub>2</sub>** and **CPDO<sub>2</sub>-Pt<sub>2</sub>** platinum complexes and cisplatin with A-375, HeLa and HFF-1 cell lines after 24 h, 48 h and 72 h of incubation. Data show means  $\pm$  SD of three independent experiments.

|                                        | IC <sub>50</sub> ( $\mu\text{M}$ ) |                |                |                |                |                |       |
|----------------------------------------|------------------------------------|----------------|----------------|----------------|----------------|----------------|-------|
|                                        | A-375                              |                |                | HeLa           |                |                | HFF-1 |
|                                        | 24h                                | 48 h           | 72 h           | 24h            | 48 h           | 72 h           | 48h   |
| <b>DHP-Pt<sub>2</sub></b>              | $67.0 \pm 6.4$                     | $52.5 \pm 5.4$ | $45.5 \pm 3.1$ | $70.8 \pm 7.2$ | $59.8 \pm 4.9$ | $36.3 \pm 4.1$ | >100  |
| <b>CPDO<sub>2</sub>-Pt<sub>2</sub></b> | $67.6 \pm 7.1$                     | $56.2 \pm 4.8$ | $46.1 \pm 4.2$ | $77.6 \pm 6.8$ | $61.9 \pm 5.2$ | $40.0 \pm 5.1$ | >100  |
| <b>Cisplatin</b>                       | $7.2 \pm 1.6$                      | $2.9 \pm 0.5$  | $2.5 \pm 0.8$  | $4.5 \pm 0.9$  | $2.9 \pm 0.6$  | $2.7 \pm 0.6$  | Nd.   |

Nd. Stands Not determined

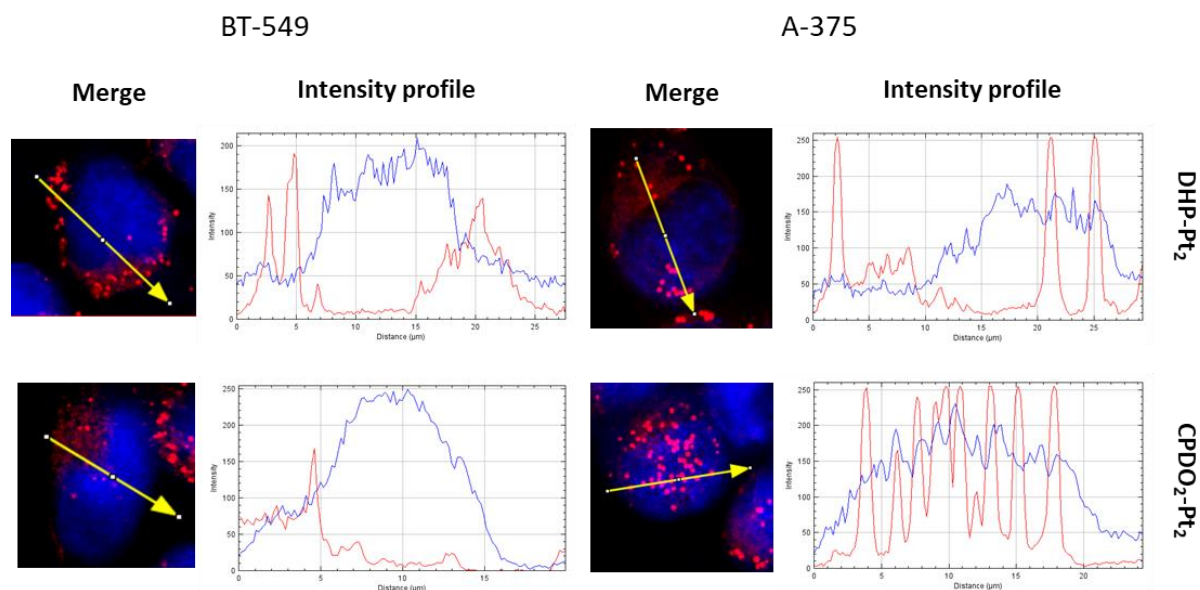

**Figure S4.** Fluorescence intensity profiles related to Figure 5.

Fluorescence intensity profiles for the both forms of the bis-platinum complex (**DHP-Pt<sub>2</sub>** and **CPDO<sub>2</sub>-Pt<sub>2</sub>**, red) and the nuclear marker Hoechst 33342 (blue) in the cancer cell lines BT-549 and A-375 (right columns). The regions of the images which were analysed are shown with yellow arrows (left columns).

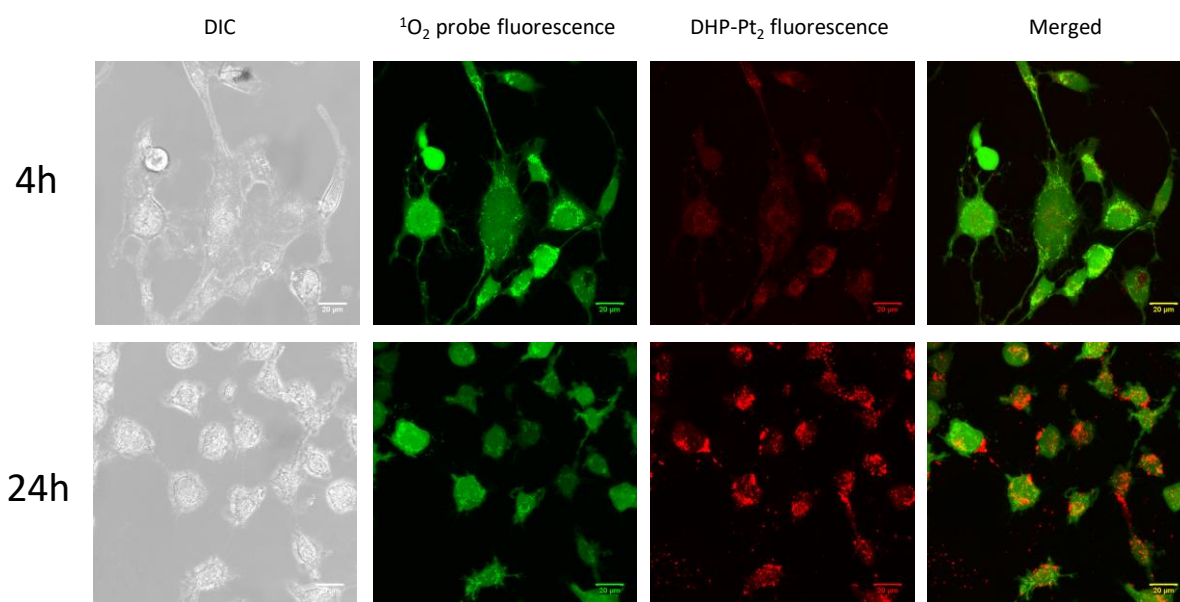

**Figure S5.** Thermal back isomerization of **CPDO<sub>2</sub>-Pt<sub>2</sub>** to **DHP-Pt<sub>2</sub>** and  $^1\text{O}_2$  release in tumorous cells related to Figure 6.

Confocal fluorescence microscope images of A-375 cells treated with 10  $\mu\text{M}$  of **CPDO<sub>2</sub>-Pt<sub>2</sub>** for 4h and 24h at 37°C. Imaging of  $^1\text{O}_2$  release from **CPDO<sub>2</sub>-Pt<sub>2</sub>** was followed using DCFH-DA as intracellular ROS probe. Scale bars are 20  $\mu\text{m}$ .

At 4h and 24h a significant DCF fluorescence (green) is observed indicating a  $^1\text{O}_2$  release from the **CPDO<sub>2</sub>-Pt<sub>2</sub>** complex in the tumorous cells. The fluorescence of the DCF observed is globally the same at 4h and 24h, indicating that the  $^1\text{O}_2$  release step is finished within 4h under our experimental conditions. The increase in **DHP-Pt<sub>2</sub>** fluorescence (in red) between microscopy images at 4 h and 24 h illustrates the thermal back isomerization (at  $T = 37^\circ\text{C}$ ) between the initially non-emissive **CPDO<sub>2</sub>-Pt<sub>2</sub>** form and the fluorescent **DHP-Pt<sub>2</sub>** form.

## NMR data

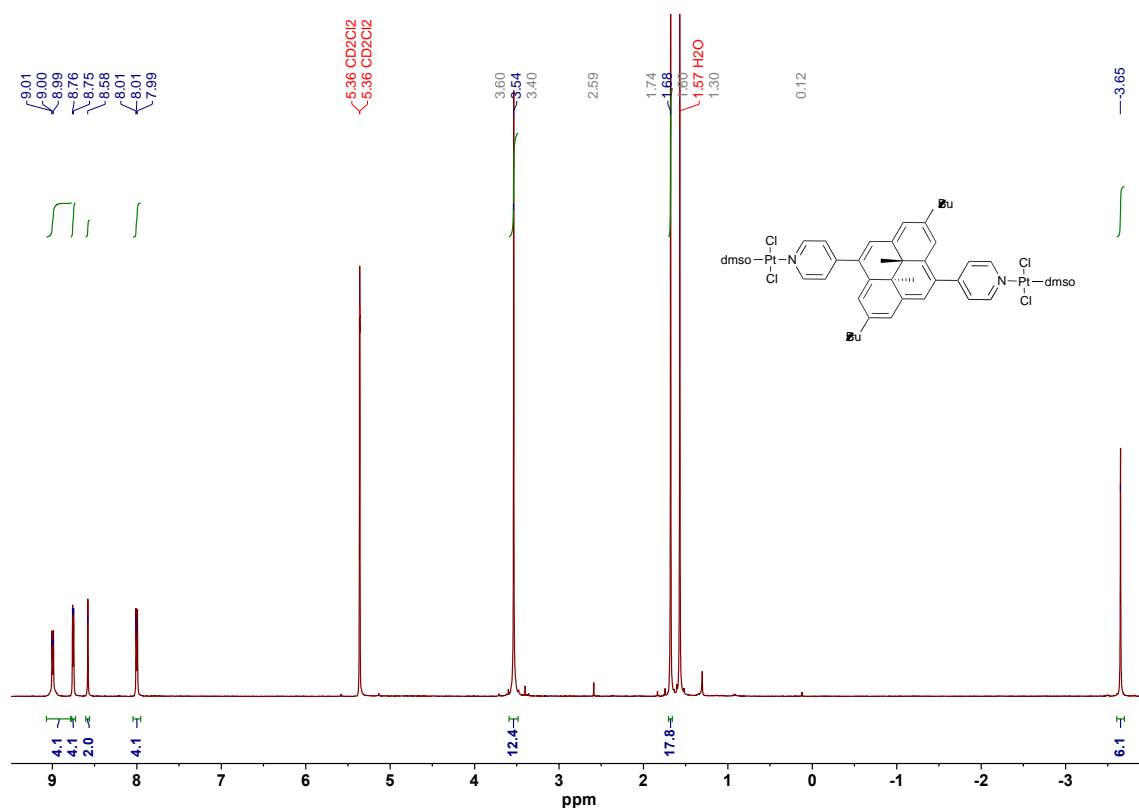

Figure S6. <sup>1</sup>H-NMR spectra of DHP-Pt<sub>2</sub> in CD<sub>2</sub>Cl<sub>2</sub> related to Figure 1.

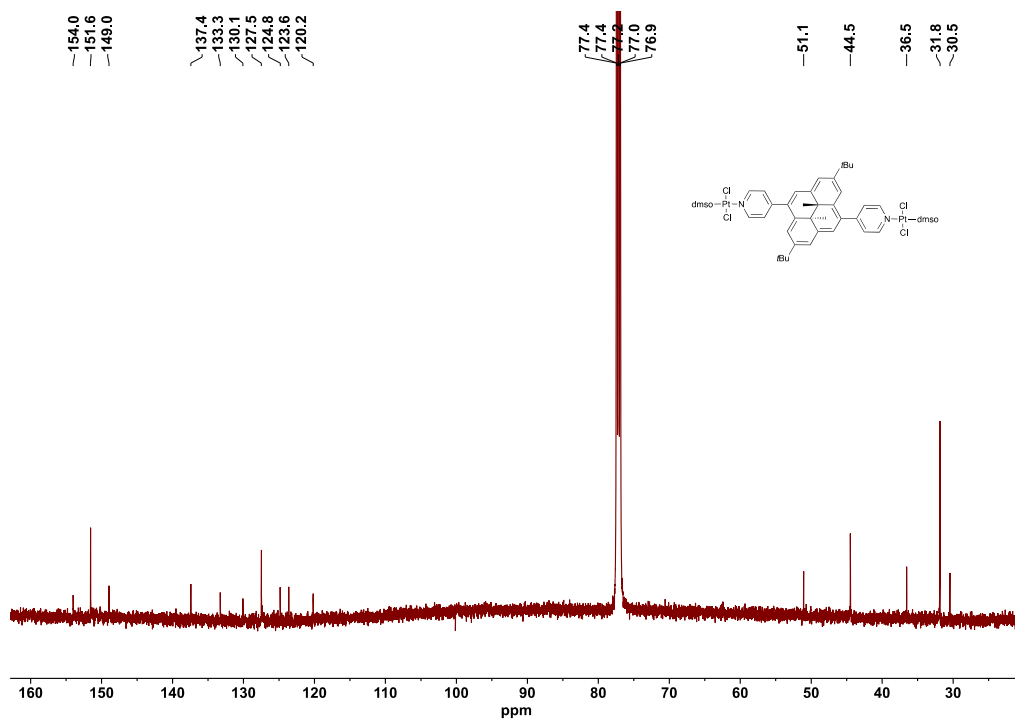

Figure S7. <sup>13</sup>C-NMR spectra of DHP-Pt<sub>2</sub> in CDCl<sub>3</sub> related to Figure 1.



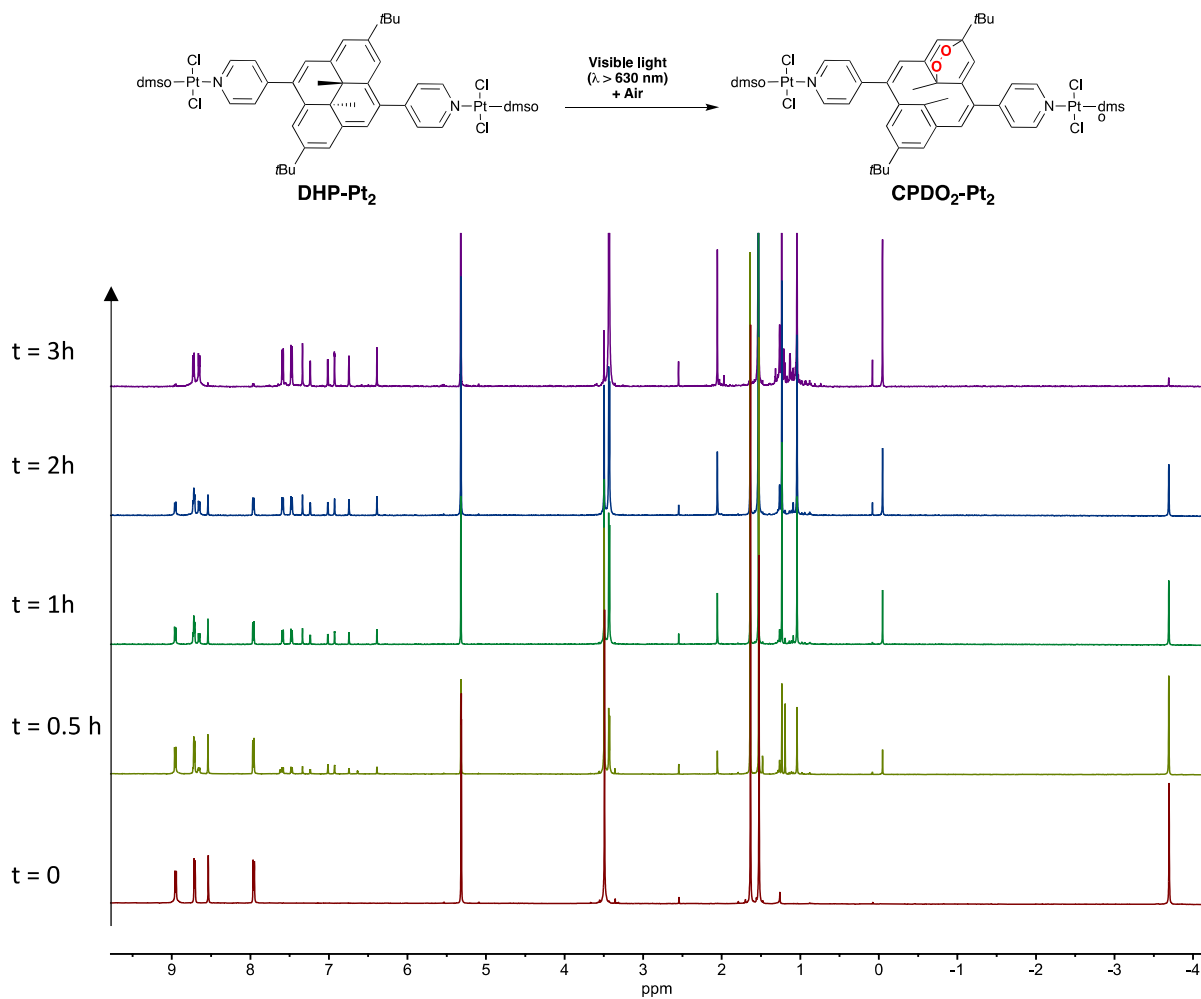

**Figure S8.** Evolution of the <sup>1</sup>H-NMR spectra of **DHP-Pt<sub>2</sub>** during illumination

Evolution of the <sup>1</sup>H-NMR spectra of **DHP-Pt<sub>2</sub>** during illumination with visible light ( $\lambda > 630$  nm) under aerobic conditions (air, P = 1 atm.). Solvent: CD<sub>2</sub>Cl<sub>2</sub> related to Figure 1.

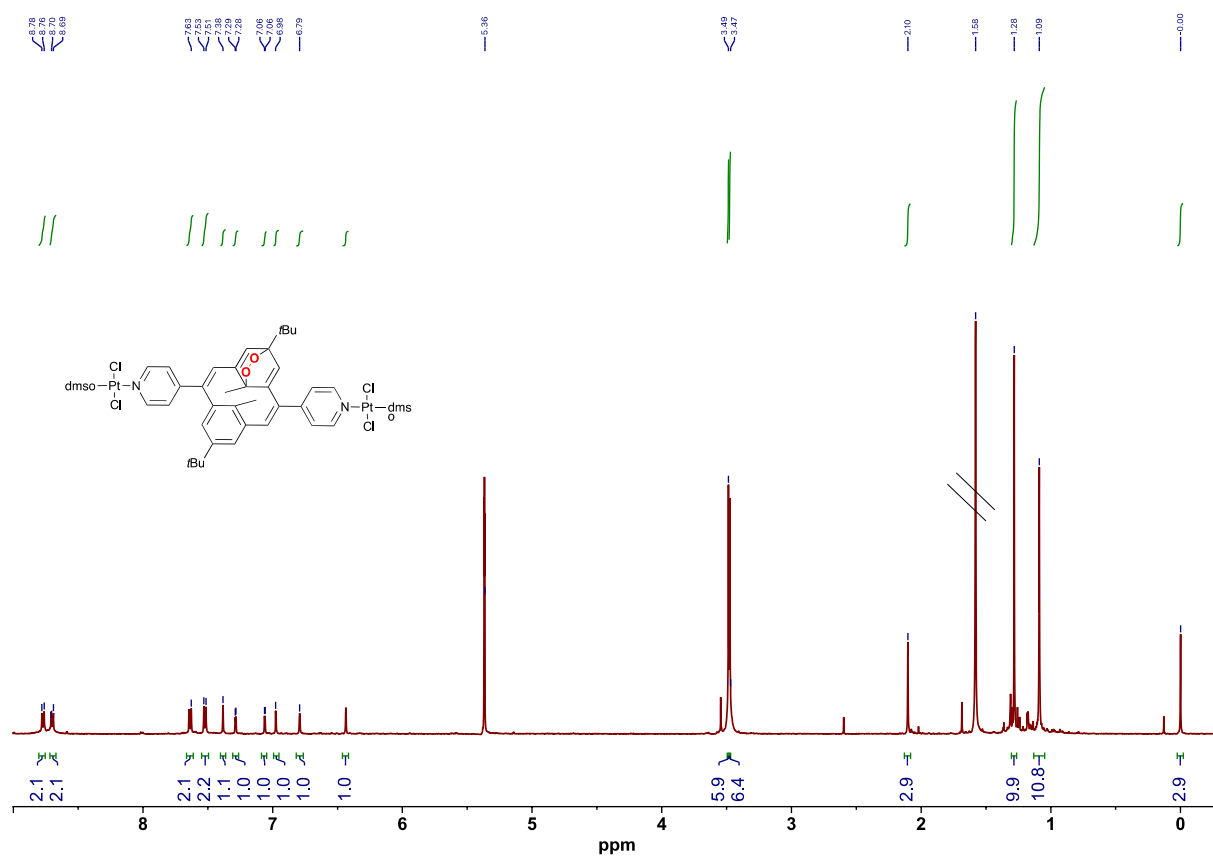

**Figure S9.** <sup>1</sup>H-NMR spectra of CPDO<sub>2</sub>-Pt<sub>2</sub> related to Figure 1.

<sup>1</sup>H-NMR spectra of CPDO<sub>2</sub>-Pt<sub>2</sub> formed by illumination with red light of a solution of DHP-Pt<sub>2</sub> in CD<sub>2</sub>Cl<sub>2</sub> (<5% of DHP-Pt<sub>2</sub> are remaining).

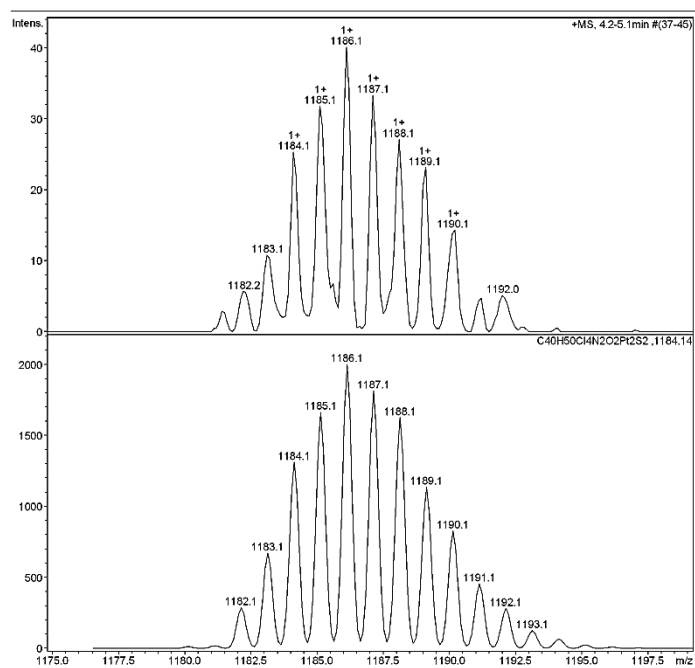

**Figure S10.** Mass spectra of **DHP-Pt<sub>2</sub>** related to Figure 1.

Experimental (top) and calculated (down) electrospray ionization mass spectra of **DHP-Pt<sub>2</sub>** in CH<sub>2</sub>Cl<sub>2</sub>.

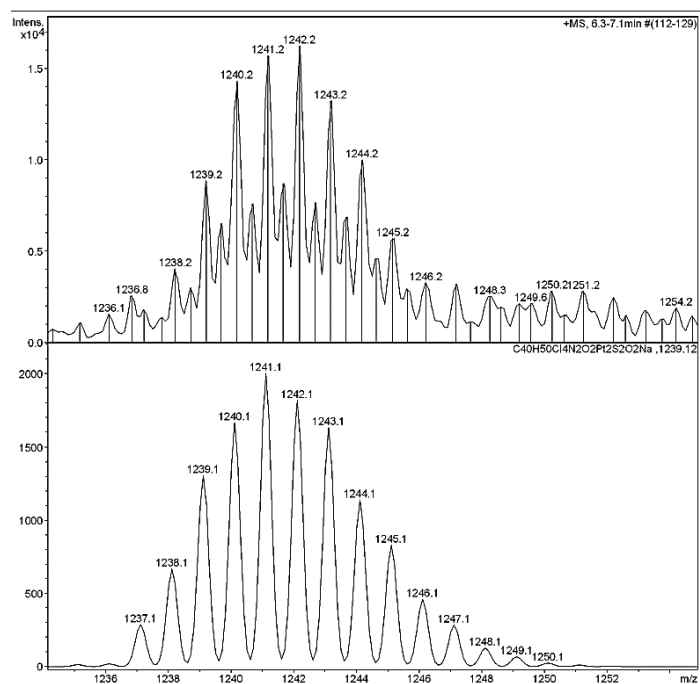

**Figure S11.** Mass spectra of **CPDO<sub>2</sub>-Pt<sub>2</sub>** related to Figure 1.

Experimental (top) and calculated (down) electrospray ionization mass spectra of **CPDO<sub>2</sub>-Pt<sub>2</sub>** in CH<sub>2</sub>Cl<sub>2</sub>.
